# Supplementary material for: Characterization of visible-light photo-Fenton reactions using Fe-doped ZnS (Fex-ZnS) mesoporous microspheres
Source: Royal Society of Chemistry journal article supplement (doi:10.1039/c8cp02609b), 2018-01-01
Supplement: c8cp02609b1.pdf [file c8cp02609b1.pdf]

*Electronic supplementary information for*

Characterization of visible-light photo-Fenton reaction using Fe-doped ZnS (Fe<sub>x</sub>-ZnS) mesoporous microspheres

Qiao Wang<sup>a</sup>, Peng Xu<sup>a</sup>, Guangshan Zhang<sup>a,\*</sup>, Wen Zhang<sup>b</sup>, Limin Hu<sup>a</sup>, Peng Wang<sup>a,\*</sup>

<sup>a</sup>*State Key Laboratory of Urban Water Resource and Environment, School of Environment, Harbin Institute of Technology, Harbin 150090, China*

<sup>b</sup>*John A. Reif, Jr. Department of Civil & Environmental Engineering, New Jersey Institute of Technology, Newark, NJ 07102, USA*

\*Corresponding authors. Address: School of Environment, Harbin Institute of Technology, No. 73 Huanghe Road, Nangang District, Harbin 150090, China.

*E-mails:* gszhanghit@gmail.com (G. S. Zhang), pwang73@vip.sina.com (P. Wang).

Tel./Fax: +86 451 86283557.

**This electronic supplementary information (ESI) contains the following sections:**

S1. Schematic diagram of photocatalytic reactor (Fig. S1).

S2. UV-Vis adsorption spectrum and standard curve of PNP (Fig. S2).

S3. Grain size distribution of Fe<sub>10%</sub>-ZnS photocatalyst (Fig. S3).

S4. Plots of  $(Ah\nu)^2$  versus  $h\nu$  (Fig. S4).

S5. Degradation efficiencies of RhB in different reaction systems (Fig. S5)

S6. Degradation efficiencies of PNP in homogeneous Fe<sup>3+</sup>/H<sub>2</sub>O<sub>2</sub>/Vis system (Fig. S6)

S7. Mass transfer calculations.

## S1. Schematic diagram of photocatalytic reactor

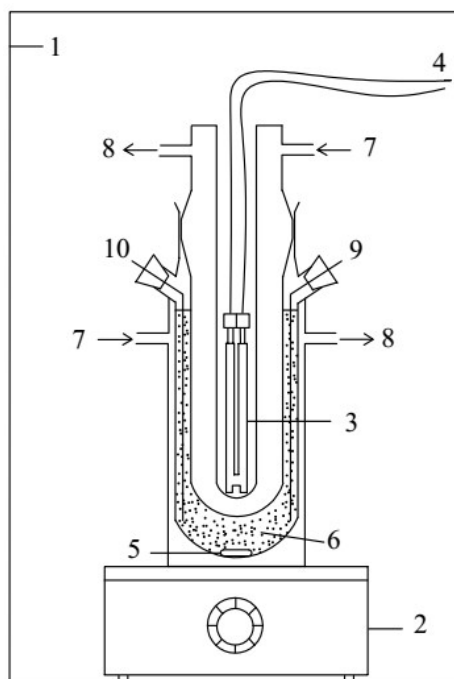

**Fig. S1.** Schematic diagram of photocatalytic reactor.

(1. Metal shield; 2. Magnetic stirrer; 3. Light source; 4. Electrical source; 5. Rotor; 6. Solution; 7. Cooling water in; 8. Circulating water out; 9. Gas in; 10. Sampling port.)

## S2. UV-Vis adsorption spectrum and standard curve of PNP

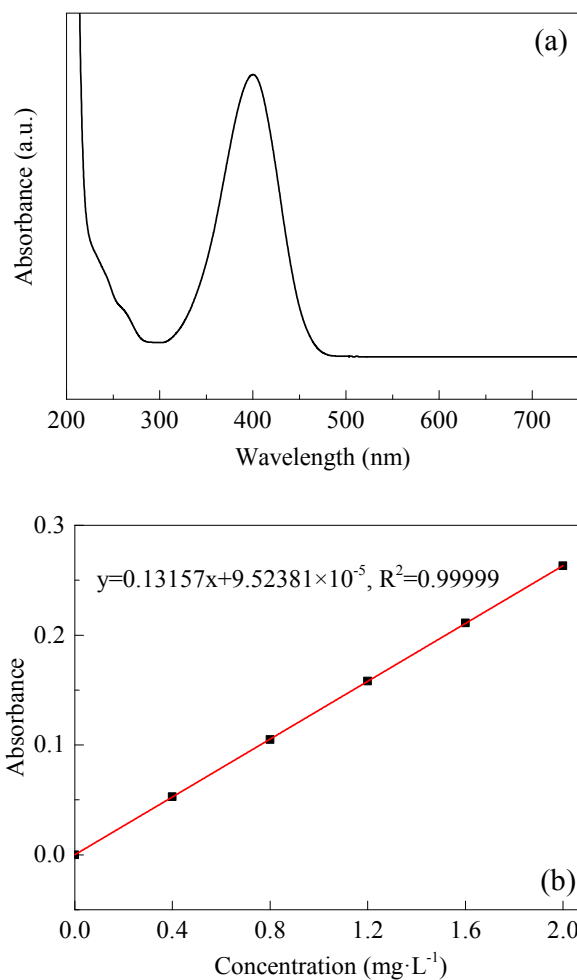

**Fig. S2.** (a) UV-Vis adsorption spectrum of initial PNP solution at pH > 11; (b) Standard curve of PNP, where x is the PNP concentration and y is the corresponding absorbance.

### S3. Grain size distribution of Fe<sub>10%</sub>-ZnS photocatalyst

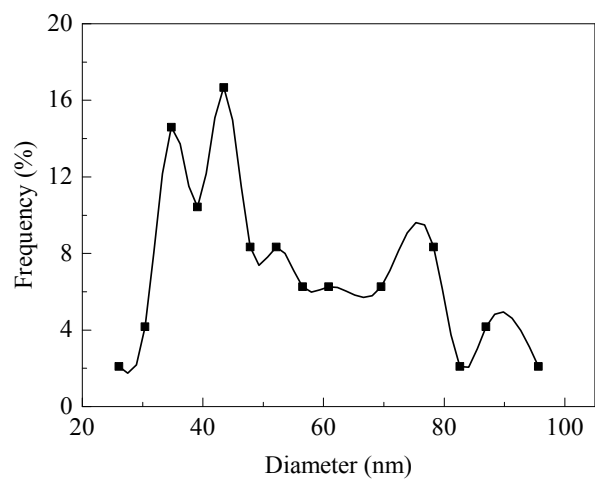

**Fig. S3.** Grain size distribution of Fe<sub>10%</sub>-ZnS photocatalyst based on the statistical measurement (more than 40 grains were counted) from the FESEM image.

#### S4. Plots of $(Ah\nu)^2$ versus $h\nu$

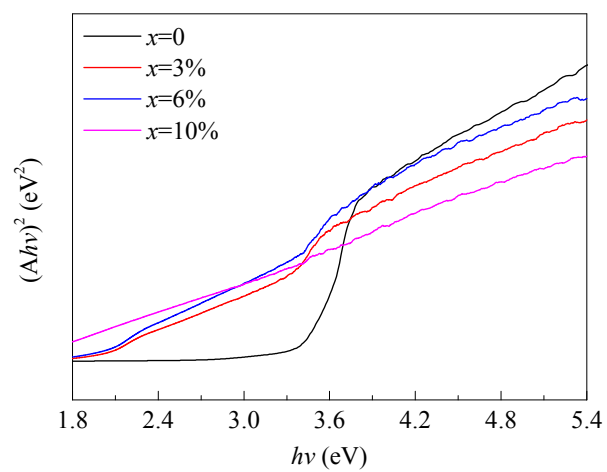

**Fig. S4.** Plots of  $(Ah\nu)^2$  versus  $h\nu$  according to the UV-Vis spectra.

## S5. Degradation efficiencies of RhB in different reaction systems

The photocatalytic activity was also detected through the degradation of rhodamine B (RhB, a common azo dye and normally adopted to test the performance of photocatalyst).

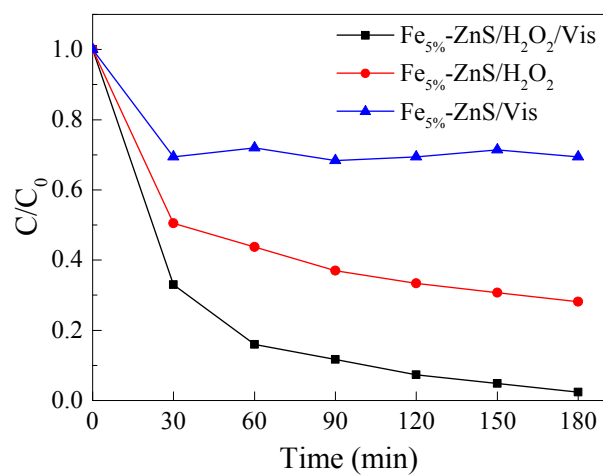

**Fig. S5.** Degradation efficiencies of RhB in different reaction systems. (Under the conditions of an initial RhB concentration of  $10 \text{ mg}\cdot\text{L}^{-1}$ , a catalyst dosage of  $0.8 \text{ g}\cdot\text{L}^{-1}$  and a  $\text{H}_2\text{O}_2$  concentration of  $2 \text{ mmol}\cdot\text{L}^{-1}$ .)

### S6. Degradation efficiency of PNP in homogeneous $\text{Fe}^{3+}/\text{H}_2\text{O}_2/\text{Vis}$ system

According to the doping molar ratio of  $\text{Fe}^{3+}$  (6%) in the  $\text{Fe}_x\text{-ZnS}$  catalyst and the catalyst dosage of  $0.8 \text{ g}\cdot\text{L}^{-1}$ , the  $\text{Fe}^{3+}$  ion concentration in the homogeneous  $\text{Fe}^{3+}/\text{H}_2\text{O}_2/\text{Vis}$  system was calculated as  $0.028 \text{ g}\cdot\text{L}^{-1}$ . The final degradation efficiency of PNP was 68.0% within 180 under visible light irradiation.

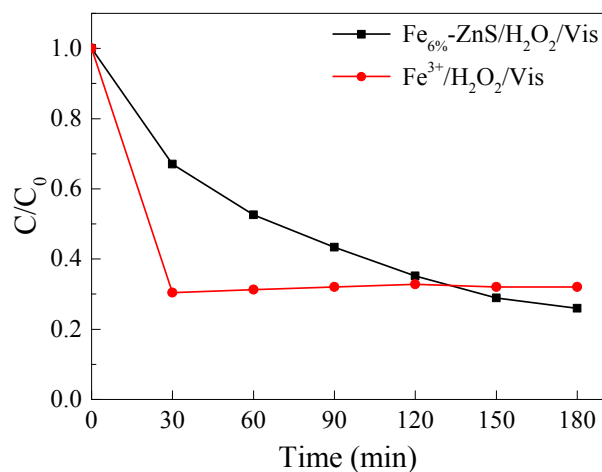

**Fig. S6.** Comparison of heterogeneous  $\text{Fe}_{6\%}\text{-ZnS}/\text{H}_2\text{O}_2/\text{Vis}$  system and homogeneous  $\text{Fe}^{3+}/\text{H}_2\text{O}_2/\text{Vis}$  system on PNP degradation efficiency. (Under the conditions of an initial PNP concentration of  $10 \text{ mg}\cdot\text{L}^{-1}$ , a  $\text{Fe}^{3+}$  concentration of  $0.028 \text{ g}\cdot\text{L}^{-1}$  and a  $\text{H}_2\text{O}_2$  concentration of  $2 \text{ mmol}\cdot\text{L}^{-1}$ .)



## S7. Mass transfer calculations

### S7.1. Aqueous/solid mass transfer limitations

The slip velocity method described previously was used to estimate the minimum expected  $k_{aq}$ , because this method calculates the mass transfer rate constant ( $k_{aq}$ ) for particles traveling at the slip velocity ( $u_t$ ) relative to the suspending liquid at high stirring rates were used. The particle's slip velocity was calculated by the Stokes Law:

$$u_t = \frac{gd_p^2(\rho_p - \rho)}{18\mu} \quad (S1)$$

where  $g$  is the gravity constant ( $9.8 \text{ N}\cdot\text{kg}^{-1}$ ),  $d_p$  and  $\rho$  are the diameter (in average) and density ( $3.9\times 10^6 \text{ kg}\cdot\text{m}^{-3}$ ) of the catalyst particle, respectively,  $\rho$  is the density of water ( $9.97\times 10^5 \text{ kg}\cdot\text{m}^{-3}$ ), and  $\mu$  is the absolute viscosity of water ( $0.89 \text{ g}\cdot\text{m}^{-1}\cdot\text{s}^{-1}$ ). The aqueous/solid mass transfer coefficients were then estimated by:

$$k_{aq} = \frac{D_{mol}}{d_p} Sh = \frac{D_{mol}}{d_p} (2 + 0.6Re^{0.5} Sc^{0.33}) \quad (S2)$$

where  $D_{mol}$  is the molecular diffusion coefficient ( $\text{cm}^2\cdot\text{s}^{-1}$ ) of the reacting solute (e.g, PNP),  $Sh$  is the Sherwood number,  $Re$  is the modified Reynold's number, and  $Sc$  is the Schmitt number. The molecular diffusion coefficient for PNP in water were calculated using the method in Hayduk and Laudie:

$$D_{mol} = \frac{13.26 \times 10^{-5}}{\mu^{1.14} (v')^{0.589}} \quad (S3)$$

where  $v'$  is the molar volume of the reacting solute ( $\text{cm}^3\cdot\text{mol}^{-1}$ ), which was calculated by the LeBas method as shown in Table S1.

**Table S1.** Calculations of molar volumes for PNP using the LeBas Method.

| PNP      | Atomic volume | Number | Total |
|----------|---------------|--------|-------|
| Carbon   | 14.8          | 6      | 88.8  |
| Hydrogen | 3.7           | 5      | 18.5  |
| Nitrogen | 17.3          | 1      | 17.3  |
| Oxygen   | 7.4           | 3      | 22.2  |
|          |               | =      | 146.8 |

Reynolds's number and Schmitt number are calculated by:

$$Re = \frac{d_p u_t}{\nu_{H_2O}} \quad (S4)$$

$$Sc = \frac{\nu_{H_2O}}{D_{mol}} \quad (S5)$$

$$Sh = 2 + 0.6Re^{0.5} Sc^{0.33} \quad (S6)$$

where  $\nu_{H_2O}$  is the kinematic viscosity of water ( $8.93 \times 10^{-7} \text{ g}\cdot\text{m}^{-1}\cdot\text{s}^{-1}$  at 25 °C).

The mass transfer rate constants were then calculated by multiplying the mass transfer coefficients by the geometric surface area of the catalyst per volume of solution.

$a$  ( $\text{m}^{-1}$ ) is the geometric surface area of the catalyst per volume of solution:

$$a = \frac{SA_p \times M}{\rho_p \times V_p} \times \frac{1}{V_R} \quad (S7)$$

where  $SA_p$  ( $\text{m}^2$ ) is the geometric surface area of one particle,  $M$  (g) is the mass of catalyst in the reactor,  $V_p$  ( $\text{m}^3$ ) is the geometric volume of one particle, and  $V_R$  (0.25 L) is the reactor volume.

Reaction rate constant  $k_{obs}$  ( $\text{s}^{-1}$ ) can be calculated in Eq. (S8):

$$k_{obs} = -\frac{\ln \frac{[A]_t}{[A]_0}}{t} \quad (S8)$$

where  $[A]_t$  and  $[A]_0$  is the concentration of reactant at time  $t$  and 0 s, respectively.  $T$  (s)

is the reaction time.

### S7.2. Intraparticle mass transfer limitations

No resistance to pore diffusion if

$$\frac{k_{obs}L^2}{De} < 1 \quad (S9)$$

Significant resistance to pore diffusion if

$$\frac{k_{obs}L^2}{De} > 1 \quad (S10)$$

where  $L$  is the characteristic diffusion pathlength for the catalyst and  $De$  is the effective diffusivity of the reacting solute.

Eqs. (S9) and (S10) provide a general measure of the characteristic time scale for diffusion relative to the characteristic time scale for reaction. A calculated value significantly less than one indicates that diffusion is fast compared to the observed reaction.  $L$  and  $De$  were estimated using the following expressions:

$$L = \frac{1}{6} d_p \quad (S11)$$

$$De = \frac{D_{mol}\theta}{\tau} \quad (S12)$$

The most conservative values from each range were used to maximize the possibility that the criterion in Eqs. (S11)-(S12). The smallest  $\theta$  (0.2) and largest  $\tau$  (10) were chosen in order to obtain the smallest possible  $De$  value, and, in turn, the largest possible value for Eqs. (S9)-(S10).
